# Supplementary material for: The Impact of lncRNA Dysregulation on Clinicopathology and Survival of Breast Cancer: A Systematic Review and Meta-analysis
Source: PubMed Central journal article supplement — Mol Ther Nucleic Acids. 2018 Jul 3;12:359–69. doi: 10.1016/j.omtn.2018.05.018 (PMC6037885; doi:10.1016/j.omtn.2018.05.018), 2018-07-03

**OMTN, Volume 12**

## **Supplemental Information**

### **The Impact of lncRNA Dysregulation on Clinicopathology and Survival of Breast Cancer: A Systematic Review and Meta-analysis**

**Tian Tian, Meng Wang, Shuai Lin, Yan Guo, Zhiming Dai, Kang Liu, Pengtao Yang, Cong Dai, Yuyao Zhu, Yi Zheng, Peng Xu, Wenge Zhu, and Zhijun Dai**

**Supplementary table 1. Characteristics of single studies included in the systematic review.**

| <b>Author &amp; Publication year</b> | <b>Country</b> | <b>LncRNAs</b>                    | <b>Number of patients</b> | <b>Expression in tumor</b> | <b>Method</b> | <b>Sample type</b> | <b>Survival</b> | <b>Follow-up (month)</b> | <b>Quality score</b> |
|--------------------------------------|----------------|-----------------------------------|---------------------------|----------------------------|---------------|--------------------|-----------------|--------------------------|----------------------|
| Wang OC 2017                         | China          | SNHG12                            | 102                       | up-regulated               | qRT-PCR       | tissue             | NR              | NR                       | 7                    |
| Yang 2017                            | China          | HOTTIP                            | 100                       | NR                         | qRT-PCR       | tissue             | OS, DFS         | 125                      | 8                    |
| Zhang 2015                           | China          | CCAT1                             | 92                        | up-regulated               | qRT-PCR       | tissue             | OS, PFS         | 60                       | 8                    |
| Xie 2016                             | China          | AFAP1-AS1                         | 76                        | down-regulated             | qRT-PCR       | tissue             | OS              | 55                       | 6                    |
| Huang QX 2015                        | China          | ACTA2-AS1                         | 47                        | down-regulated             | qRT-PCR       | tissue             | NR              | NR                       | 6                    |
| Adriansens 1998                      | France         | H19                               | 102                       | up-regulated               | ISH           | tissue             | NR              | NR                       | 6                    |
| Nie 2017                             | China          | Z38                               | 110                       | up-regulated               | qRT-PCR       | tissue             | OS              | 51                       | 9                    |
| Li 2017                              | China          | TUNAR                             | 63                        | up-regulated               | qRT-PCR       | tissue             | OS              | 60                       | 8                    |
| Shi 2015                             | China          | SPRY4-IT1                         | 48                        | up-regulated               | qRT-PCR       | tissue             | NR              | NR                       | 6                    |
| Yang 2016                            | China          | FGF14-AS2                         | 64                        | down-regulated             | qRT-PCR       | tissue             | OS              | 16.7                     | 6                    |
| Xu 2016                              | China          | EPB41L4A-AS2                      | 250                       | down-regulated             | qRT-PCR       | tissue             | OS              | 60                       | 7                    |
| Shi 2016                             | China          | HULC                              | 96                        | up-regulated               | qRT-PCR       | tissue             | OS              | 60                       | 8                    |
| Liao 2016                            | China          | APOC1P1-3                         | 90                        | up-regulated               | qRT-PCR       | tissue             | NR              | NR                       | 7                    |
| Lei 2016                             | China          | MVIH                              | 250                       | up-regulated               | qRT-PCR       | tissue             | OS, DFS         | 60                       | 8                    |
| Deng 2016                            | China          | LINC00978                         | 195                       | up-regulated               | qRT-PCR       | tissue             | DFS             | 47.6                     | 8                    |
| Chi 2014                             | China          | BC040587                          | 151                       | down-regulated             | qRT-PCR       | tissue             | OS              | 60                       | 8                    |
| Xu 2015                              | China          | EGOT                              | 250                       | down-regulated             | qRT-PCR       | tissue             | OS              | 60                       | 8                    |
| Vennin 2017                          | France         | 91H                               | 41                        | up-regulated               | qRT-PCR       | tissue             | NR              | NR                       | 6                    |
| Iranpour 2016                        | Iran           | ANRASSF, SOX2OT, PTPRG-AS1, ANRIL | 38                        | up-regulated               | qRT-PCR       | tissue             | NR              | NR                       | 6                    |
| Liu M 2017                           | China          | HIF1A-AS2, UCA1, ANRIL            | 60                        | up-regulated               | qRT-PCR       | serum              | NR              | NR                       | 6                    |

|             |       |            |     |                |         |               |         |     |   |
|-------------|-------|------------|-----|----------------|---------|---------------|---------|-----|---|
| Chen 2016   | China | Linc-ROR   | 142 | up-regulated   | qRT-PCR | tissue        | NR      | NR  | 7 |
| Fang 2017   | China | HOXA-AS2   | 38  | up-regulated   | qRT-PCR | tissue        | NR      | NR  | 6 |
| Li X 2016   | China | GAS6-AS1   | 90  | down-regulated | qRT-PCR | tissue        | OS, DFS | 60  | 8 |
| Liu 2016    | China | UCA1       | 54  | up-regulated   | qRT-PCR | tissue        | OS      | 60  | 6 |
| Li WX 2017  | China | linc-ITGB1 | 224 | up-regulated   | qRT-PCR | tissue        | OS, DFS | 60  | 8 |
| Sha 2017    | China | DANCR      | 63  | up-regulated   | qRT-PCR | tissue        | OS      | 60  | 7 |
| Wang Y 2017 | China | PVT1       | 110 | up-regulated   | qRT-PCR | tissue        | OS      | 60  | 6 |
| Liu GX 2017 | China | OR3A4      | 65  | up-regulated   | qRT-PCR | tissue        | OS      | 60  | 6 |
| Li YD 2018  | China | CRALA      | 176 | NR             | qRT-PCR | tissue        | NR      | NR  | 8 |
| Rui 2017    | China | HOXB-AS5   | 66  | up-regulated   | qRT-PCR | tissue& serum | NR      | NR  | 6 |
| Li Y 2018   | China | FENDRR     | 52  | down-regulated | qRT-PCR | tissue        | OS, PFS | 60  | 8 |
| Liang 2018  | China | LINP1      | 67  | NR             | qRT-PCR | tissue        | OS, DFS | 43  | 7 |
| Kong 2018   | China | SNHG15     | 58  | up-regulated   | qRT-PCR | tissue        | OS      | 60  | 6 |
| Liu J 2017  | China | SUMO1P3    | 74  | up-regulated   | qRT-PCR | tissue        | OS      | 150 | 7 |
| Jiang 2017  | China | ARA        | 55  | up-regulated   | qRT-PCR | tissue        | NR      | NR  | 7 |

OS: overall survival; DFS: disease-free survival; MFS: metastasis-free survival; RFS: relapse- free survival; PFS: progression-free survival; NR: not report;

qRT-PCR: quantitative real-time polymerase chain reaction; ISH: in situ hybridization.

**Supplementary Table 2. Meta-analysis results of the associations between the expression of eight lncRNAs and clinicopathological features of BC.**

| lncRNAs  |                        | Age               | Tumor size         | LN metastasis            | Histological grade       | TNM stage                | ER status               | PR status                | Her2 status              |
|----------|------------------------|-------------------|--------------------|--------------------------|--------------------------|--------------------------|-------------------------|--------------------------|--------------------------|
| MALAT1   | OR (95%CI)             | 0.98 (0.75, 1.28) | 0.88 (0.67, 1.16)  | 1.40 (0.64, 3.06)        | 1.18 (0.63, 2.20)        | 1.64 (0.63, 4.23)        | 1.13 (0.66, 1.94)       | <b>1.41 (1.08, 1.84)</b> | 1.01 (0.75, 1.37)        |
|          | <i>P</i>               | 0.86              | 0.35               | 0.39                     | 0.61                     | 0.31                     | 0.65                    | <b>0.01</b>              | 0.92                     |
|          | I <sup>2</sup> & model | 0% (fixed)        | 0% (fixed)         | 79% (random)             | 59% (random)             | 80% (random)             | 70% (random)            | 6% (fixed)               | 0% (fixed)               |
| MEG3     | OR (95%CI)             | 0.79 (0.56, 1.12) | 1.12 (0.78, 1.61)  | 0.75 (0.22, 2.52)        | <b>0.61 (0.41, 0.91)</b> | 0.77 (0.20, 2.94)        | 0.97 (0.60, 1.58)       | 0.99 (0.62, 1.56)        | 0.83 (0.32, 2.18)        |
|          | <i>P</i>               | 0.19              | 0.53               | 0.64                     | <b>0.01</b>              | 0.70                     | 0.91                    | 0.95                     | 0.71                     |
|          | I <sup>2</sup> & model | 0% (fixed)        | 0% (fixed)         | 89% (random)             | 36% (fixed)              | 91% (random)             | 46% (fixed)             | 0% (fixed)               | 71% (random)             |
| CCAT2    | OR (95%CI)             | 0.53 (0.27, 1.07) | 0.93 (0.44, 1.96)  | 0.91 (0.05, 17.0)        | 1.22 (0.60, 2.48)        | 0.42 (0.01, 27.73)       | 1.38 (0.72, 2.67)       | 1.40 (0.72, 2.72)        | 0.53 (0.28, 1.03)        |
|          | <i>P</i>               | 0.08              | 0.85               | 0.95                     | 0.58                     | 0.68                     | 0.33                    | 0.32                     | 0.06                     |
|          | I <sup>2</sup> & model | 0% (fixed)        | 0% (fixed)         | 93% (random)             | 0% (fixed)               | 93% (random)             | 0% (fixed)              | 0% (fixed)               | 0% (fixed)               |
| BCAR4    | OR (95%CI)             | 0.97 (0.71, 1.32) | 1.04 (0.75, 1.44)  | 1.03 (0.62, 1.70)        | 1.52 (0.60, 3.86)        | /                        | <b>0.2 (0.05, 0.82)</b> | 1.08 (0.58, 2.01)        | 0.44 (0.02, 8.19)        |
|          | <i>P</i>               | 0.83              | 0.83               | 0.91                     | 0.38                     | /                        | <b>0.03</b>             | 0.81                     | 0.58                     |
|          | I <sup>2</sup> & model | 0% (fixed)        | 0% (fixed)         | 0% (fixed)               | 72% (random)             | /                        | /                       | 0% (fixed)               | /                        |
| TUSC7    | OR (95%CI)             | 1.61 (0.57, 4.51) | 0.34 (0.02, 4.96)  | 0.97 (0.38, 2.45)        | 3.80 (0.67, 21.6)        | 1.00 (0.29, 3.39)        | 0.72 (0.25, 2.08)       | 0.64 (0.06, 7.33)        | <b>2.75 (1.06, 7.14)</b> |
|          | <i>P</i>               | 0.36              | 0.43               | 0.95                     | 0.13                     | 1.00                     | 0.55                    | 0.72                     | <b>0.04</b>              |
|          | I <sup>2</sup> & model | 0% (fixed)        | 83% (random)       | 0% (fixed)               | /                        | /                        | 0% (fixed)              | 70% (random)             | 47% (fixed)              |
| TP73-AS1 | OR (95%CI)             | 2.16 (0.85, 5.50) | 2.79 (0.68, 11.53) | 0.53 (0.03, 10.66)       | /                        | <b>5.76 (2.64, 12.6)</b> | 0.82 (0.40, 1.67)       | 0.59 (0.29, 1.21)        | 1.33 (0.57, 3.13)        |
|          | <i>P</i>               | 0.11              | 0.16               | 0.68                     | /                        | <b>&lt;0.01</b>          | 0.59                    | 0.15                     | 0.51                     |
|          | I <sup>2</sup> & model | /                 | 68% (random)       | 91% (random)             | /                        | 0% (fixed)               | 0% (fixed)              | 0% (fixed)               | /                        |
| NEAT1    | OR (95%CI)             | 0.85 (0.47, 1.55) | 1.24 (0.67, 2.32)  | <b>3.00 (1.09, 8.24)</b> | 0.95 (0.34, 2.63)        | <b>3.52 (1.84, 6.73)</b> | 0.74 (0.41, 1.35)       | 1.53 (0.84, 2.79)        | 4.49 (0.24, 84.81)       |
|          | <i>P</i>               | 0.60              | 0.49               | <b>0.03</b>              | 0.92                     | <b>&lt;0.01</b>          | 0.32                    | 0.16                     | 0.32                     |

|        |                        |                   |                          |                   |                   |                    |                   |                   |                   |
|--------|------------------------|-------------------|--------------------------|-------------------|-------------------|--------------------|-------------------|-------------------|-------------------|
|        | I <sup>2</sup> & model | 0% (fixed)        | 0% (fixed)               | /                 | /                 | 0% (fixed)         | 14% (fixed)       | 0% (fixed)        | 85% (random)      |
| TUG1   | OR (95%CI)             | 1.18 (0.60, 2.32) | 1.53 (0.20, 11.98)       | 0.27 (0.02, 3.17) | /                 | 1.82 (0.11, 28.83) | 1.03 (0.51, 2.10) | 0.77 (0.40, 1.50) | 1.44 (0.33, 6.29) |
|        | <i>P</i>               | 0.63              | 0.68                     | 0.29              | /                 | 0.67               | 0.93              | 0.45              | 0.63              |
|        | I <sup>2</sup> & model | 42% (fixed)       | 82% (random)             | 91% (random)      | /                 | 93% (random)       | 0% (fixed)        | 13% (fixed)       | 76% (random)      |
| HOTAIR | OR (95%CI)             | 1.28 (0.73, 2.26) | 1.22 (0.23, 6.36)        | 1.07(0.30, 3.88)  | 1.75 (0.58, 5.26) | /                  | 0.72 (0.39, 1.32) | /                 | 1.46 (0.72, 2.93) |
|        | <i>P</i>               | 0.39              | 0.82                     | 0.91              | 0.32              | /                  | 0.28              | /                 | 0.29              |
|        | I <sup>2</sup> & model | 0% (fixed)        | 88% (random)             | 76% (random)      | 70% (random)      | /                  | 0% (fixed)        | /                 | 0% (fixed)        |
| CRNDE  | OR (95%CI)             | 0.86 (0.47, 1.58) | <b>2.71 (1.20, 6.12)</b> | 2.19 (0.86, 5.57) | 2.08 (0.79, 5.50) | 1.89 (0.74, 4.85)  | 1.14 (0.62, 2.11) | 2.06 (1.12, 3.77) | 0.98 (0.52, 1.83) |
|        | <i>P</i>               | 0.63              | <b>0.02</b>              | 0.10              | 0.14              | 0.19               | 0.67              | 0.02              | 0.94              |
|        | I <sup>2</sup> & model | 0% (fixed)        | /                        | /                 | /                 | 53% (random)       | 0% (fixed)        | 0% (fixed)        | 0% (fixed)        |

LN: lymph node; ER: estrogen receptor; PR: progesterone receptor; Her2: human epidermal growth factor receptor 2; OR: odds ratio; CI: confidence interval; /: no pooling result.

**Supplementary Table 3. *P* values of the correlations between lncRNAs expression and BC clinicopathological features in single studies.**

| lncRNAs      | Age   | Tumor size       | LN metastasis    | Histological grade | TNM stage        | ER status    | PR status    | Her2 status  | Reference |
|--------------|-------|------------------|------------------|--------------------|------------------|--------------|--------------|--------------|-----------|
| SNHG12       | 0.692 | <b>0.012</b>     | <b>0.041</b>     | 0.739              | 0.053            | NR           | NR           | NR           | 49        |
| HOTTIP       | 0.161 | <b>0.025</b>     | <b>0.009</b>     | 0.685              | <b>&lt;0.001</b> | 0.161        | 0.422        | 0.135        | 51        |
| CCAT1        | 0.919 | 0.510            | <b>0.004</b>     | <b>0.003</b>       | <b>&lt;0.001</b> | 0.492        | 0.537        | 0.224        | 52        |
| AFAP1-AS1    | 0.435 | 0.694            | <b>0.002</b>     | 0.231              | <b>0.013</b>     | NR           | NR           | NR           | 56        |
| ACTA2-AS1    | 0.454 | 0.665            | 0.172            | 0.943              | <b>0.029</b>     | 0.543        | 0.665        | 0.891        | 57        |
| H19          | 0.430 | <b>0.005</b>     | 0.231            | 0.39               | NR               | <b>0.005</b> | <b>0.016</b> | NR           | 50        |
| Z38          | 0.182 | NR               | <b>0.013</b>     | 0.795              | <b>0.002</b>     | 0.972        | 0.455        | 0.807        | 53        |
| TUNAR        | 0.732 | NR               | <b>0.004</b>     | <b>0.004</b>       | 0.071            | 0.436        | 0.785        | 0.061        | 54        |
| SPRY4-IT1    | 0.241 | <b>0.015</b>     | NR               | 0.272              | <b>0.017</b>     | <b>0.005</b> | NR           | NR           | 58        |
| FGF14-AS2    | 0.071 | <b>0.005</b>     | <b>0.047</b>     | NR                 | <b>0.036</b>     | 0.491        | 0.684        | NR           | 59        |
| APOC1P1-3    | NR    | <b>0.014</b>     | 0.205            | 0.592              | NR               | 0.827        | 0.832        | 0.516        | 64        |
| EPB41L4A-AS2 | 0.357 | <b>0.026</b>     | NR               | <b>0.034</b>       | <b>0.016</b>     | <b>0.013</b> | <b>0.021</b> | 0.871        | 60        |
| HULC         | 0.127 | 0.059            | <b>&lt;0.001</b> | <b>0.020</b>       | <b>&lt;0.001</b> | NR           | NR           | NR           | 55        |
| MVIH         | 0.206 | 0.236            | 0.054            | 0.233              | NR               | 0.699        | 0.612        | 0.897        | 47        |
| LINC00978    | 0.240 | 1.000            | 0.623            | NR                 | 0.145            | <b>0.033</b> |              | 0.489        | 63        |
| BC040587     | 0.675 | 0.356            | 0.489            | <b>0.035</b>       | 0.964            | 0.828        | 0.900        | 0.559        | 61        |
| EGOT         | 0.368 | <b>0.022</b>     | <b>0.020</b>     | NR                 | NR               | 0.240        | 0.199        | 0.625        | 62        |
| 91H          | 0.174 | <b>&lt;0.001</b> | <b>0.038</b>     | 0.104              | NR               | 0.983        | 0.273        | <b>0.027</b> | 65        |
| ANRASSF1     | 0.346 | 0.109            | 0.496            | 0.517              | 0.472            | 0.193        | 0.635        | <b>0.004</b> | 48        |
| SOX2OT       | 0.092 | 0.977            | 0.437            | 0.981              | 0.932            | 0.437        | 0.495        | 0.332        | 48        |
| PTPRG-AS1    | 0.631 | 0.687            | 0.217            | 0.603              | 0.993            | 0.067        | 0.403        | 0.252        | 48        |

|            |       |                  |                  |              |                  |              |                  |              |          |
|------------|-------|------------------|------------------|--------------|------------------|--------------|------------------|--------------|----------|
| ANRIL      | 0.085 | 0.766            | 0.381            | 0.422        | 0.981            | 0.619        | 0.305            | 0.209        | 48<br>67 |
| HIF1A-AS2  | 0.190 | 0.304            | <b>0.012</b>     | 0.301        | NR               | NR           | NR               | NR           | 67       |
| UCA1       | 0.331 | 0.172            | <b>0.037</b>     | 0.105        | NR               | NR           | NR               | NR           | 67       |
| Linc-ROR   | 0.701 | 0.649            | <b>&lt;0.001</b> | NR           | 0.209            | NR           | NR               | NR           | 68       |
| HOXA-AS2   | 0.885 | <b>&lt;0.001</b> | <b>&lt;0.001</b> | NR           | <b>&lt;0.001</b> | NR           | NR               | NR           | 70       |
| GAS6-AS1   | 0.209 | 0.180            | <b>0.030</b>     | <b>0.010</b> | 0.109            | 0.527        | 0.509            | 0.576        | 66       |
| linc-ITGB1 | 0.375 | 0.600            | <b>0.002</b>     | NR           | <b>0.013</b>     | 0.342        | 0.301            | NR           | 69       |
| DANCR      | 0.378 | 0.433            | <b>0.021</b>     | <b>0.014</b> | <b>0.017</b>     | NR           | NR               | NR           | 71       |
| PVT1       | 0.578 | <b>0.02</b>      | <b>0.023</b>     | NR           | <b>0.002</b>     | NR           | NR               | NR           | 72       |
| OR3A4      | 0.620 | 0.801            | <b>0.026</b>     | <b>0.048</b> | <b>0.013</b>     | 0.213        | 0.218            | <b>0.013</b> | 73       |
| CRALA      | 0.063 | <b>&lt;0.001</b> | <b>&lt;0.001</b> | NR           | <b>0.001</b>     | <b>0.005</b> | <b>&lt;0.001</b> | 0.098        | 74       |
| HOXB-AS5   | 0.760 | NR               | 0.730            | NR           | <b>0.048</b>     | NR           | NR               | NR           | 75       |
| FENDRR     | 0.794 | 0.071            | <b>0.006</b>     | 0.064        | NR               | 0.179        | <b>0.016</b>     | <b>0.008</b> | 87       |
| LINP1      | 0.396 | 0.494            | 0.901            | NR           | <b>0.035</b>     | 0.111        | <b>0.590</b>     | <b>0.537</b> | 76       |
| SNHG15     | 0.592 | <b>0.007</b>     | <b>0.038</b>     | NR           | <b>0.028</b>     | NR           | NR               | NR           | 77       |
| SUMO1P3    | 0.746 | <b>0.014</b>     | <b>0.032</b>     | NR           | <b>0.037</b>     | 0.103        | 0.242            | 0.330        | 78       |
| ARA        | 0.624 | <b>0.034</b>     | 0.180            | 0.786        | 0.278            | NR           | NR               | NR           | 79       |

LN: lymph node; ER: estrogen receptor; PR: progesterone receptor; Her2: human epidermal growth factor receptor 2; NR: not report.

**Figure S1** Begg's funnel plot for publication bias on the associations between the expression of lncRNAs and breast cancer overall survival. Each point represents a single study for the indicated association.

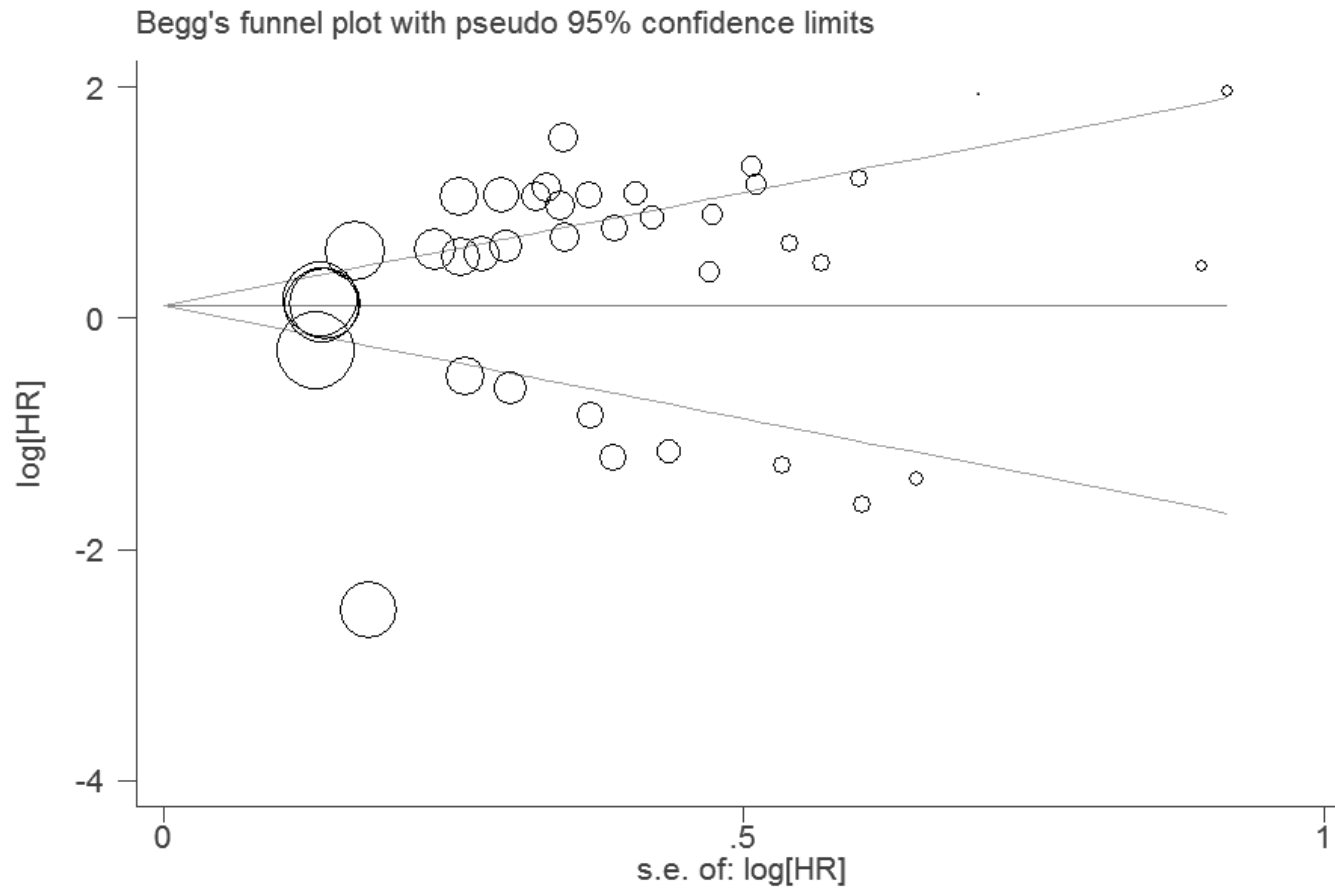

Supplement: mmc1.pdf [file mmc1.pdf]
